# Supplementary material for: Skin cancer outcomes and risk factors in renal transplant recipients: Analysis of organ procurement and transplantation network data from 2000 to 2021
Source: Front Oncol. 2022 Nov 24;12:1017498. doi: 10.3389/fonc.2022.1017498 (PMC9731355; doi:10.3389/fonc.2022.1017498)
Supplement: Supplementary Table 1 — Recipient ethnicity and donor type in patient received caucasian donor kidney. [file Table_1.xlsx]

## Sheet: sup1
	SCC （n=7334）	BCC （n=6093）	Melanoma （n=936）	Cancer Free （n=185201）	p value
Donor ethnicity, White, No.(%)	6373 ( 86.9)	5406 ( 88.7)	844 ( 90.2)	127127 ( 68.6)	<.001
Recipient ethnicity in White Donor, No.(%)
White	6104 ( 95.8)	5250 ( 97.1)	816 ( 96.7)	83462 ( 65.7)	<.001
Black	97 ( 1.5)	22 ( 0.4)	5 ( 0.6)	26130 ( 20.6)
Hispanic	107 ( 1.7)	94 ( 1.7)	17 ( 2.0)	10681 ( 8.4)
Donor type in White Donor, No.(%)
Living donor-White recipient	3359 ( 52.7)	3090 ( 57.2)	434 ( 51.4)	43920 ( 34.5)	<.001
Living donor-Non white recipient	49 ( 0.8)	41 ( 0.8)	9 ( 1.1)	4166 ( 3.3)
Deceased donor-White recipient No.(%)	2745 ( 43.1)	2160 ( 40.0)	382 ( 45.3)	39541 ( 31.1)
Deceased donor-Non white recipient	220 ( 3.5)	115 ( 2.1)	19 ( 2.3)	39500 ( 31.1)
